# Supplementary material for: Endoscopic endonasal resection of giant pituitary neuroendocrine tumors - case series from the referral pituitary center
Source: Research Square preprint supplement (doi:10.21203/rs.3.rs-7557934/v1), 2025-09-17
Supplement: Supplementary file 1 [file 0d8a13ebbacb3fd45f8a7b89.docx]

Table 1 Pathomorphological characteristics

| **Variables** | **Number of patients** | **Percentage of patients** |
| --- | --- | --- |
| **Immunohistochemical staining positive for:** | - | - |
| GH | 11 | 6.3% |
| PRL | 24 | 13.6% |
| ACTH | 10 | 5.7% |
| TSH | 6 | 3.4% |
| FSH | 79 | 44.9% |
| LH | 107 | 60.8% |
| **Alpha 1 subunit staining** | - | - |
| positive | 95 | 54.0% |
| negative | 79 | 44.8% |
| **Ki-67/MIB1 staining** | - | - |
| <3% | 114 | 64.8% |
| 3% | 12 | 6.8% |
| >3% | 8 | 4.5% |
| >5% | 3 | 1.7% |
| >10% | 1 | 0.6% |
| >20% | 1 | 0.6% |
| **Diagnosis** | - | - |
| Gonadotroph adenoma | 120 | 68.2% |
| Gonadotroph adenoma with oncocytic change | 27/120 | 22.5% |
| Sparsely granulated lactotroph adenoma | 14 | 8.0% |
| Densely granulated lactotroph adenoma | 1 | 0.6% |
| Sparsely granulated corticotroph adenoma | 5 | 2.8% |
| Densely granulated corticotroph adenoma | 1 | 0.6% |
| Crooke’s cell adenoma | 2 | 1.1% |
| Sparsely granulated somatotroph adenoma | 4 | 2.3% |
| Thyrotroph adenoma | 1 | 0.6% |
| Plurihormonal adenoma | 2 | 1.1% |
| Null cell adenoma | 19 | 10.8% |

Table 2 Extent of resection associated with Knosp scale, and consistency of the tumor

| **Extent of resection** | **GTR and NTR, N (%)** | **STR, N (%)** | **PR, N (%)** |
| --- | --- | --- | --- |
| **Knosp II** | 49 (54.4%) | 32 (35.6%) | 9 (10.0%) |
| **Knosp III** | 23 (46.9%) | 18 (36.7%) | 8 (16.3%) |
| **Knosp IV** | 2 (5.4%) | 26 (70.3%) | 9 (24.3%) |
| **Soft tumor** | 67 (43.2%) | 65 (41.9%) | 23 (14.8%) |
| **Fibrous tumor** | 7 (33.3%) | 11 (52.4%) | 3 (14.3%) |

Table 3 Complications occurrence in patients with specific Knosp scale grades

| **Grade** | **Complications present, N (%)** | **Complications absent N (%)** |
| --- | --- | --- |
| **Knosp II** | 37 (41.1%) | 53 (58.9%) |
| **Knosp III** | 11 (22.4%) | 38 (77.6%) |
| **Knosp IV** | 11 (29.7%) | 26 (70.3%) |
